# Supplementary material
Source: PubMed Central journal article supplement (PMC3057809)
Supplement: supp_M110.183558_jbc.M110.183558-1.pdf [file supp_M110.183558_jbc.M110.183558-1.pdf]

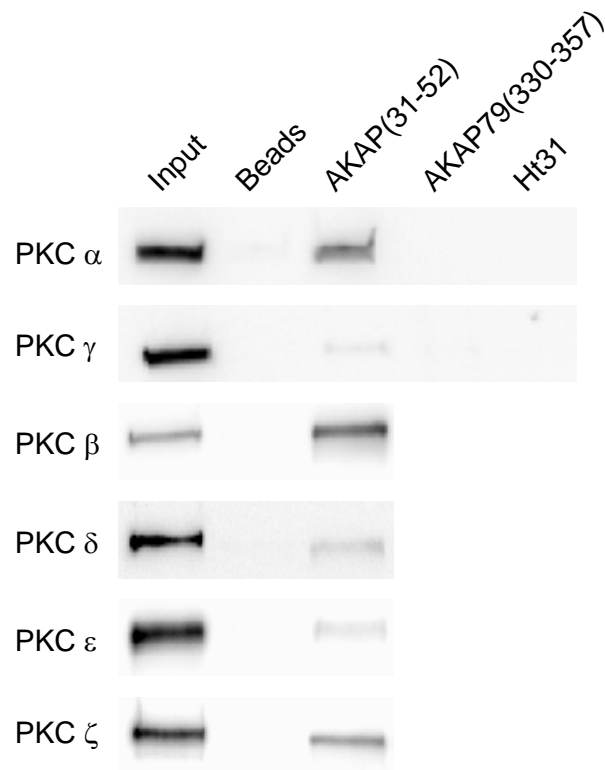

**Supplementary Figure 1:** PKC isoforms bind specifically to AKAP79(31-52). PKC isoforms (200 ng each) were incubated with neutravidin beads alone (beads) or neutravidin beads in the presence of biotinylated-AKAP79(31-52) or biotinylated-AKAP79(330-357) or biotinylated-Ht31 peptide (a prototypical PKA anchoring peptide) for PKC $\alpha$  and PKC $\gamma$ . Following overnight incubation and washing in PKC binding buffer, samples were separated by SDS-PAGE and examined by western blotting. PKC isoforms only bound in the presence of AKAP79(31-52). 50 ng (25%) of each PKC isoform was loaded into the input lane. The fraction of PKC bound can be deduced by comparing the signal intensity from the amount of PKC recovered in the presence of AKAP79 to that in the input lane.

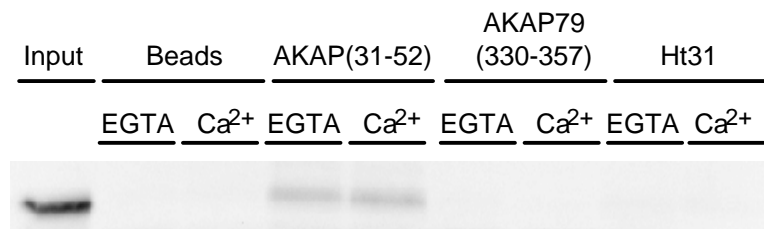

**Supplementary Figure 2:** CaM binds specifically to AKAP79(31-52). CaM (8.5  $\mu\text{g}$ ) was incubated with neutravidin beads alone (beads) or neutravidin beads in the presence of biotinylated-AKAP79(31-52) or biotinylated-AKAP79(330-357) or biotinylated-Ht31 peptide in Ca<sup>2+</sup>-free (EGTA) or Ca<sup>2+</sup> containing binding solution. Following overnight incubation and washing in respective buffers, samples were separated by SDS-PAGE and examined by western blotting. CaM only bound in the presence of AKAP79(31-52) and preferentially in the presence of Ca<sup>2+</sup>. The input lane contains 25 ng of CaM.

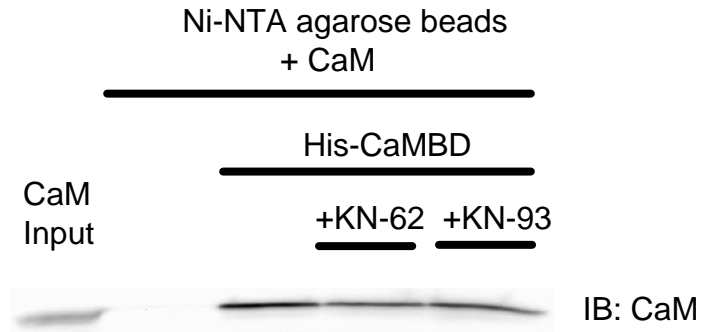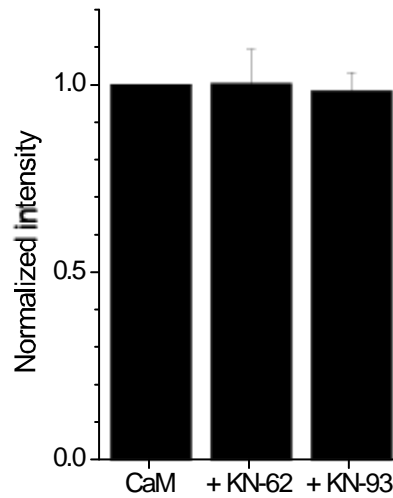

**Supplementary Figure 3:** CaM association to the CaMBD is not altered by KN-62 or KN-93. His-CaMBD (2.5  $\mu\text{g}$ ) was first incubated with Ni-NTA-agarose beads in  $\text{Ca}^{2+}$ -free buffer. After washing the beads, CaM (85  $\mu\text{g}$ ) was added to beads alone or to His-CaMBD charged beads in the absence or presence of and KN-62 (1  $\mu\text{M}$ ) or KN-93 (1  $\mu\text{M}$ ). Following overnight incubation and washing in respective buffers, samples were separated by SDS-PAGE and examined by western blotting. *Top*, Representative western blot demonstrating that CaM bound to the Ni-NTA agarose beads only in the presence of the His-CaMBD. This ability of CaM to bind to the CaMBD was unaffected by either KN-62 or KN-93. *Bottom*, Graph summarizing the results obtained from 3 experiments.
